# Supplementary material
Source: Elsevier journal article supplement (https://www.sciencedirect.com/science/article/pii/S0210480616302029)
Supplement: mmc1 [file S0210480616302029:mmc1.pdf]

## ENCUESTA FORMACIÓN POSTGRADO - CONFEDERACIÓN AMERICANA DE UROLOGÍA

1. ¿Cuál es su PAIS?
2. ¿Cuántos Especialistas en Urología completan en su país su formación cada año?
3. ¿Cuántos años dura la Formación Postgraduado en Urología en su país?
4. ¿Se trata de un programa de desarrollo troncal? Es decir, ¿está la Especialidad de Urología encuadrada dentro de las Especialidades Quirúrgicas y es necesario hacer un periodo de formación común, junto con el resto de especialidades quirúrgicas?
5. Si es así, ¿cuánto tiempo dura la rotación del residente en Urología en cirugía general?
6. ¿Existe algún decreto Ley o Normativa que regula la Formación de Especialistas?
7. Si es así, ¿puede referenciarla o remitirla (preferentemente hipervínculo)?
8. ¿Qué entidad / autoridad emite la Certificación de Especialista en Urología en su país?
9. ¿Qué nivel de dificultad tiene un Especialista en encontrar su primer trabajo en su país? (Ninguno, Algo de dificultad, Bastante dificultad, Mucha dificultad)
10. ¿Tiene su país déficit o superávit de especialistas? (Déficit, Ni déficit ni superávit (equilibrio), Superávit)
11. ¿Cuántos Especialistas en Urología calcula que hay en su país?
12. ¿Cuál es la población actual de su país?
13. ¿Se lleva a cabo en su país una prueba de evaluación que acredite a los Especialistas en Urología al final de su formación?
14. ¿Se lleva a cabo en su país una re-certificación periódica que acredite a los Especialistas en Urología de forma continuada?
15. De ser así, ¿en su país con qué frecuencia debe un Especialista en Urología re-certificarse?
16. ¿Qué entidad se encarga de facilitar actividades de Formación Continuada en Urología en su país?
17. ¿Piensa que un Especialista en Urología en su país desearía obtener un Certificado común que le acreditase como Urólogo en el entorno de la Confederación Americana de Urología (América Latina, España y Portugal)?
18. De ser así, ¿Cree que estaría dispuesto a examinarse para obtener esta certificación conjunta?
19. ¿Cree que la entidad / autoridad que emite la Certificación de Especialista en Urología en su país podría llegar a aceptar como válida una certificación conjunta en el entorno de la Confederación Americana de Urología (América Latina, España y Portugal)?
20. Especifique por favor su nombre y correo electrónico
